# Supplementary figures and images for: Contrasting Roles of Programmed Death-Ligand 1 Expression in Tumor and Stroma in Prognosis of Esophageal Squamous Cell Carcinoma
Source: MDPI journal article supplement (doi:10.3390/cancers16061135), 2024-03-13

Figure S1

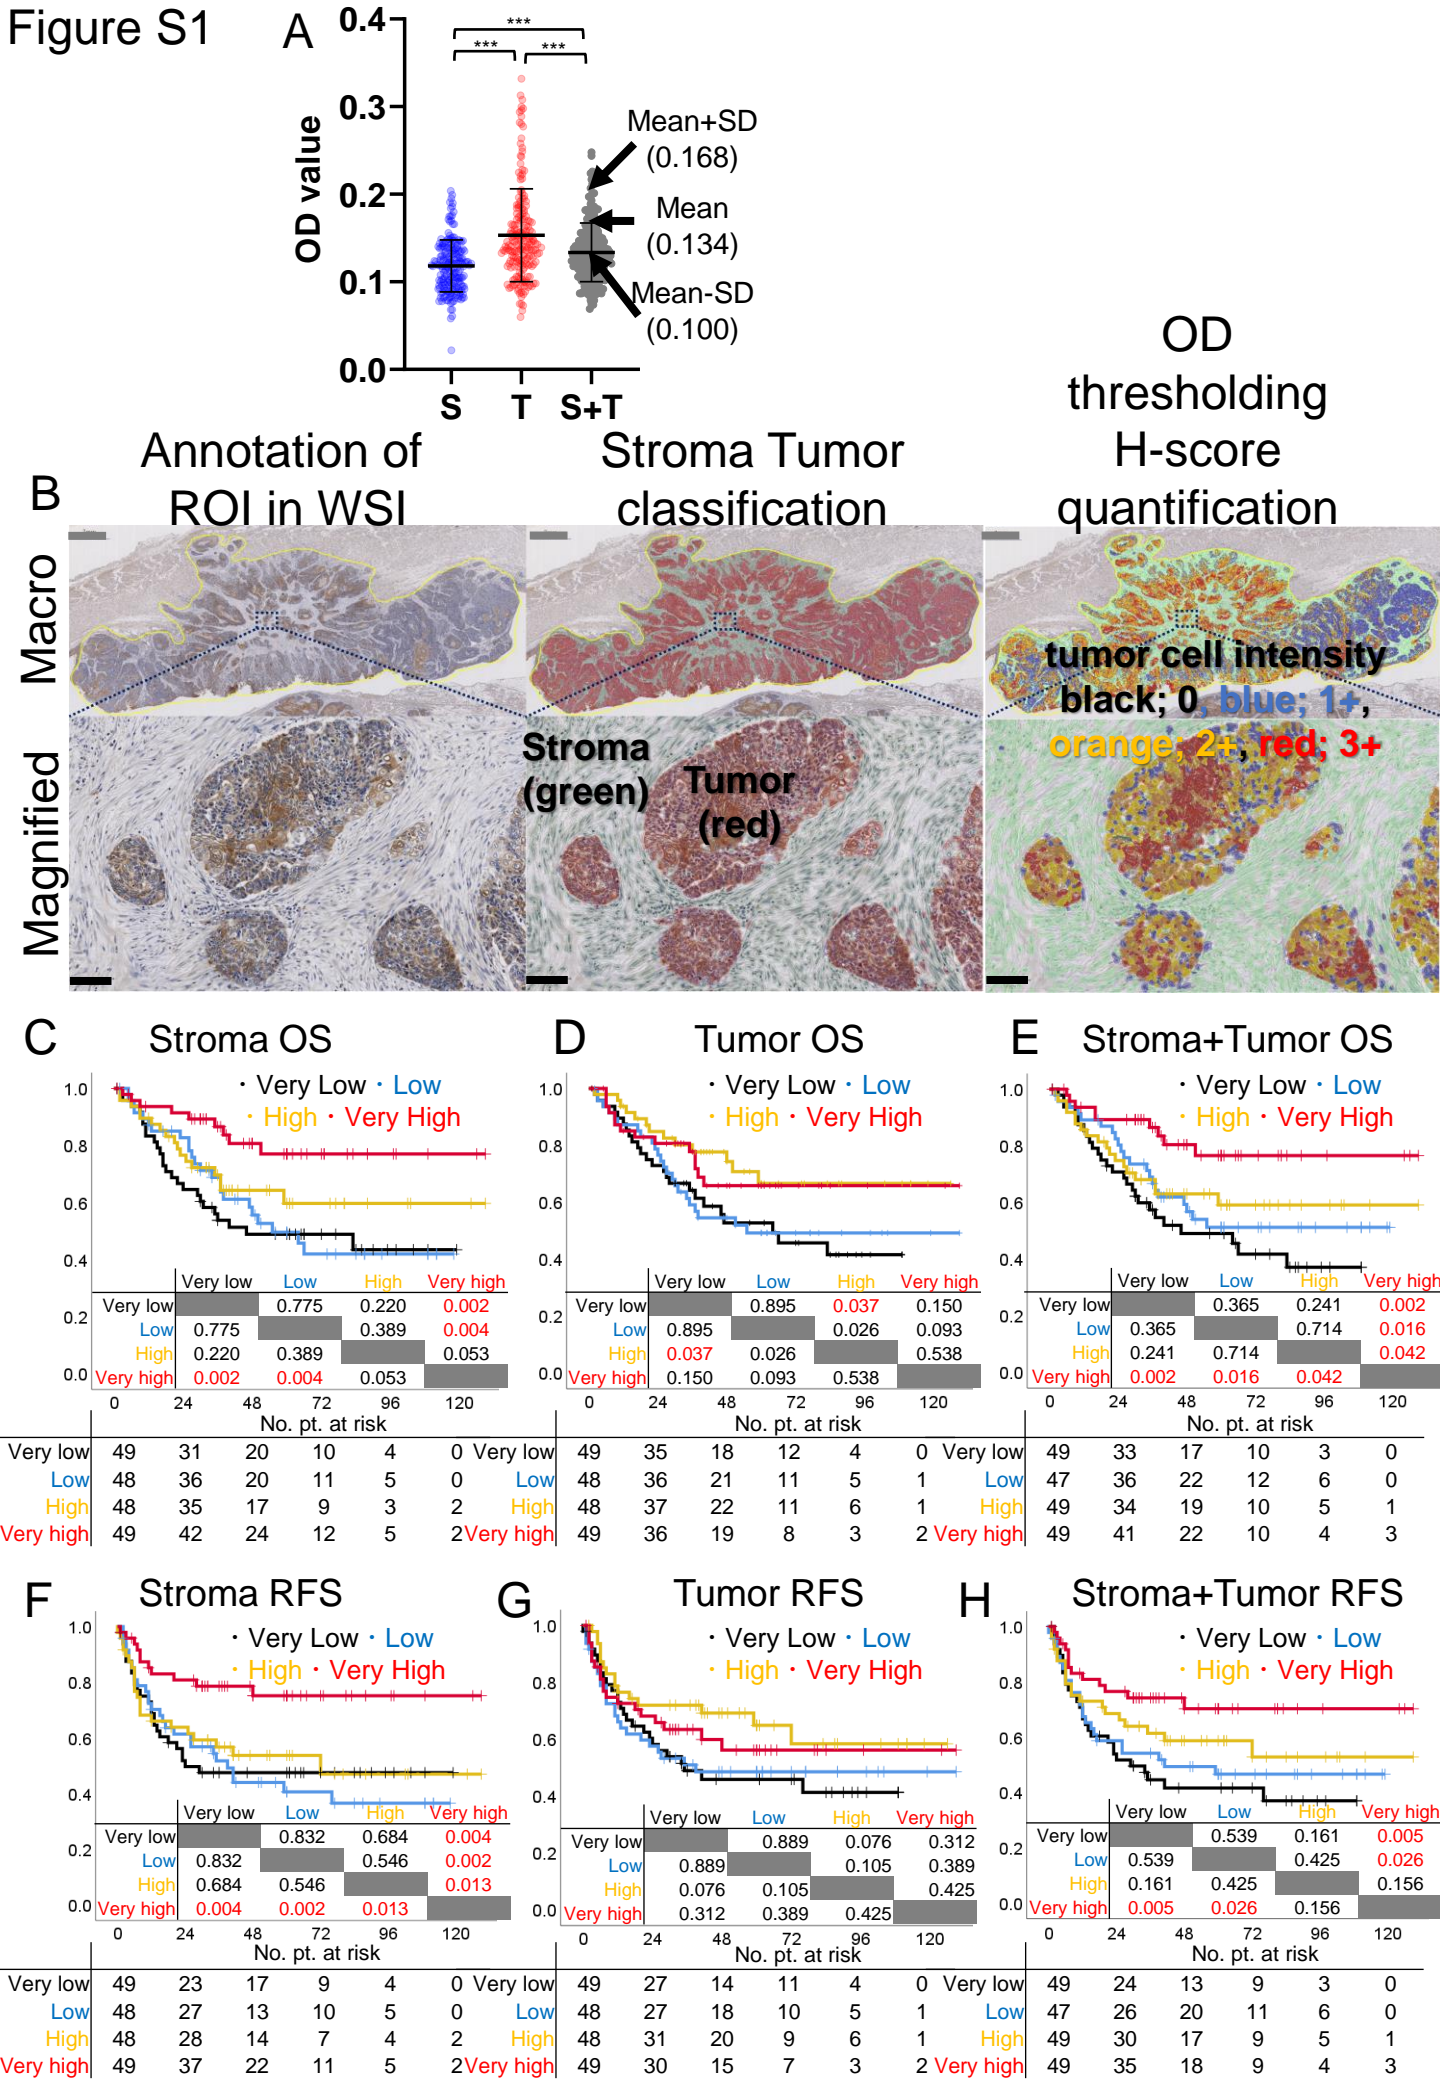

Supplement: s1 [file s1]

Figure S2

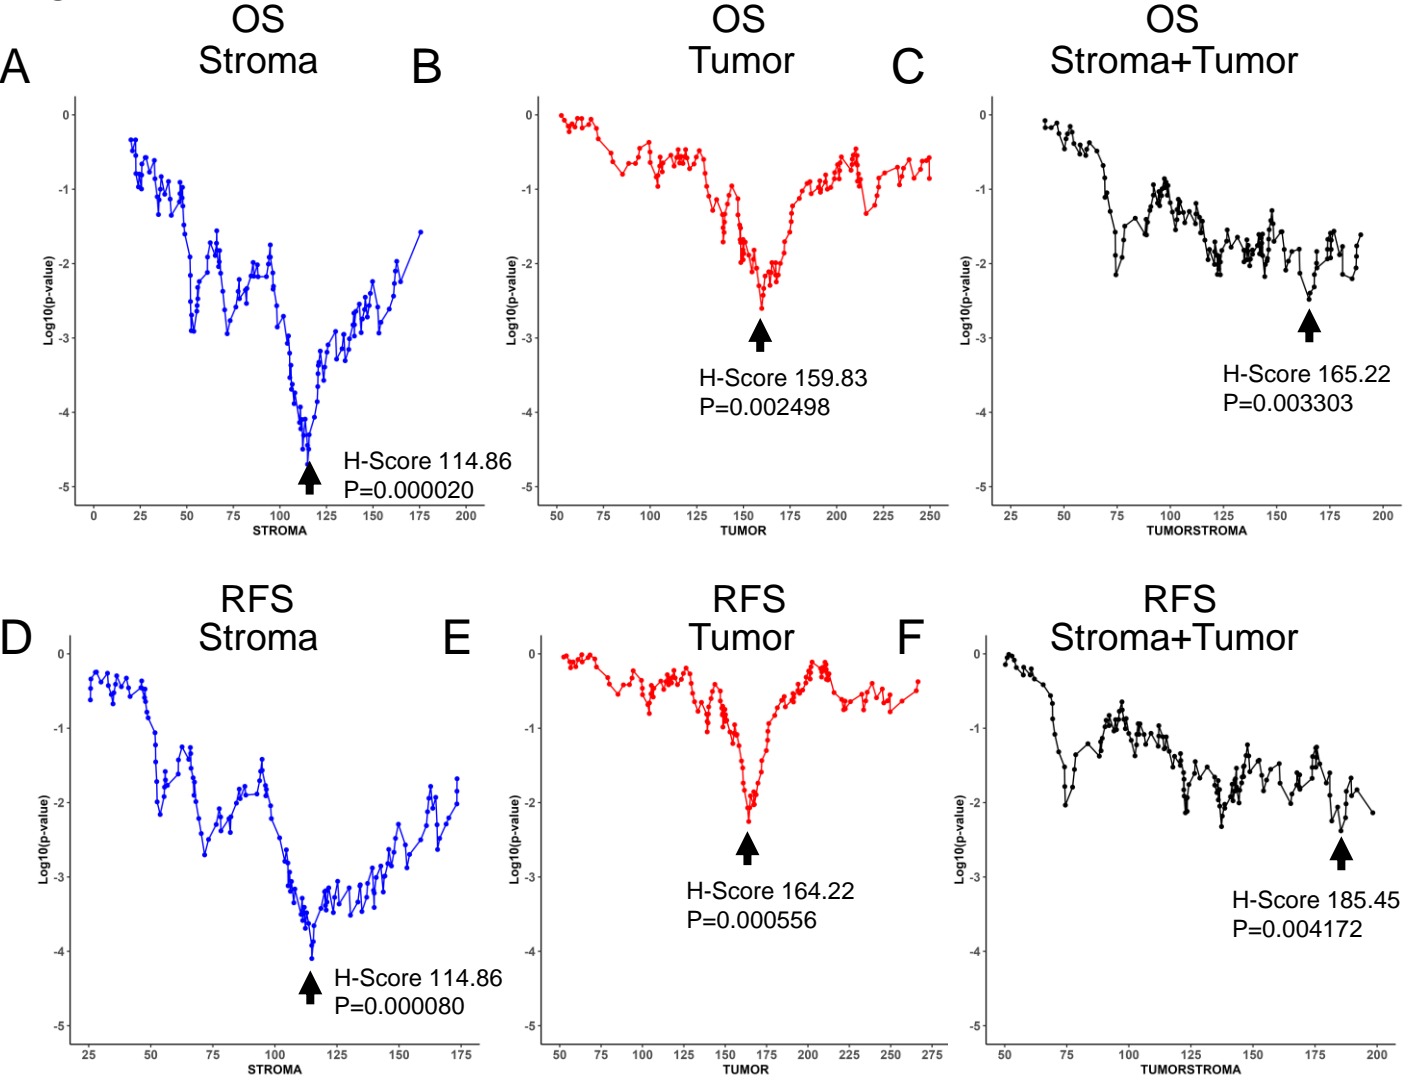

Supplement: s1 [file s1]
